# Supplementary material for: AI-powered Glaucoma Management: Predicting the Optimal Surgical Treatment
Source: Research Square preprint supplement (doi:10.21203/rs.3.rs-6244012/v1), 2025-04-30
Supplement: Supplementary file 1 [file 6a89ccb2e2eb011c69daa61b.docx]

**Appendix 1**

**Model:**

The ANFIS model is probably the Machine-Learning model which most closely resembles the human pattern-recognition process. First, from the raw sensory inputs (input data) clusters are formed (memberships) that produces a rough grouping of data based on its similarity to previous knowledge (memory or learned patterns). This can be considered as similar to the perception process in the brain. Then, a cognition process starts by passing the rough groups through logical rules to filter them further into the final decision. The ANFIS model achieves this by two layers of equations: the first one represents a neural network layer which learns its weights in a way that a group of neurons would start to favor one specific type of data group. The second group of neurons represent the Fuzzy rule-base which learns its parameters in such a way that further combinations of various neurons from the previous layer becomes possible. The resulting output of the second layer provides a score (0 to 1) which is similar to the probabilistic value obtained through Bayesian or other classifiers. A typical ANFIS structure is shown in Figure 2:

| 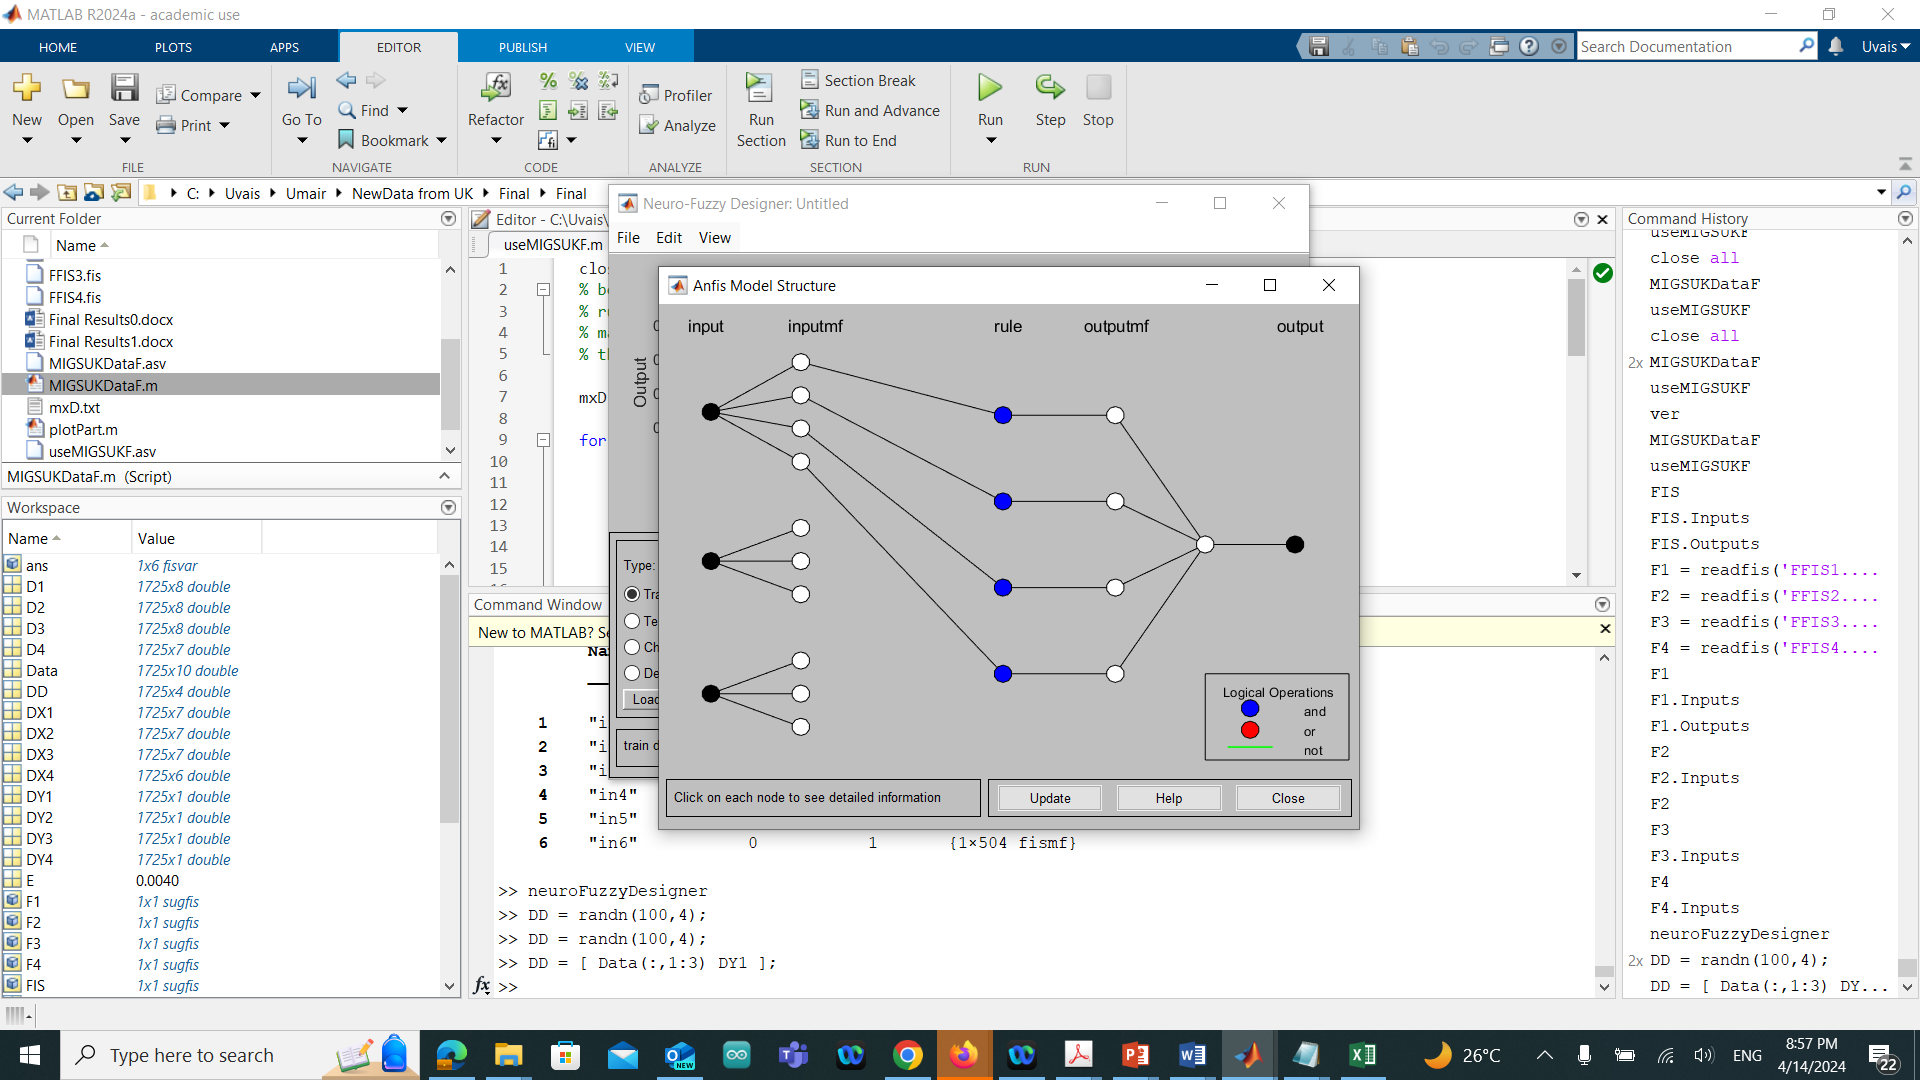  (a) | 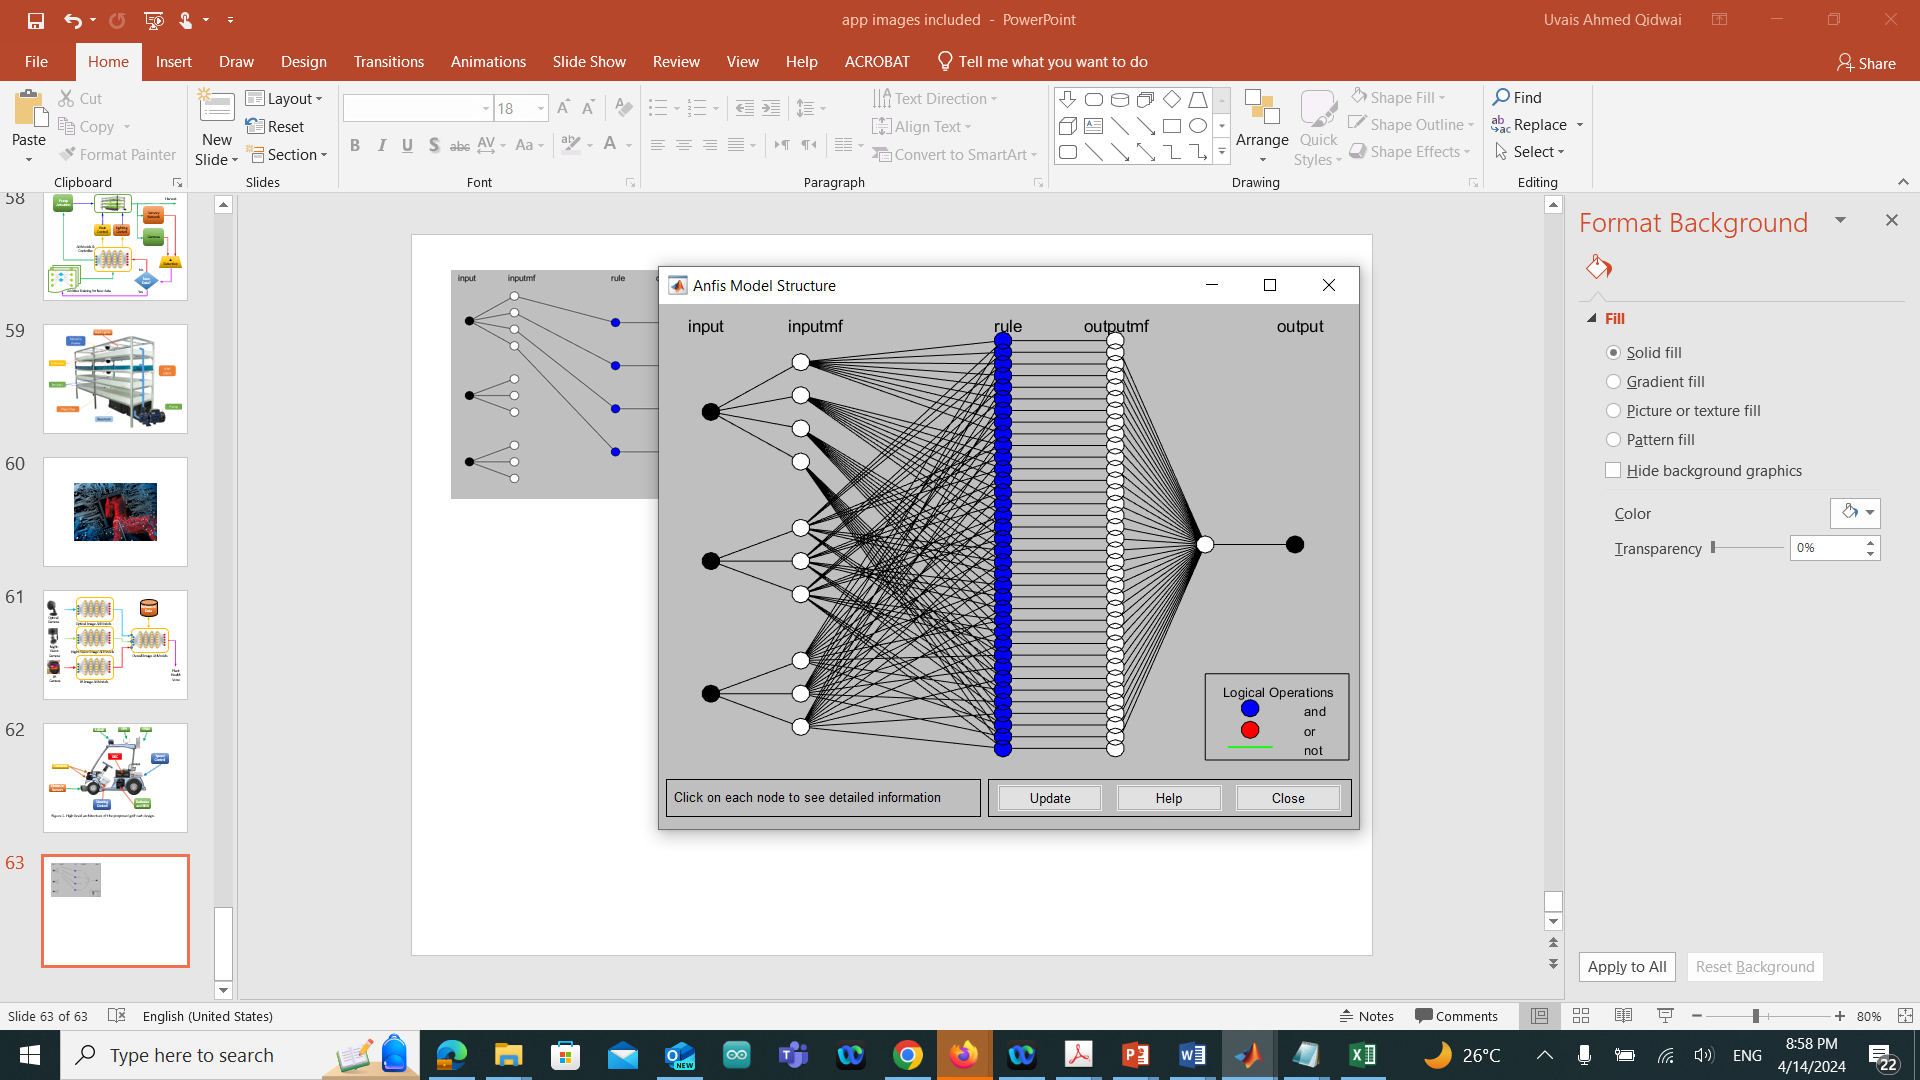  (b) |
| --- | --- |

Common Parameters:

1. Number of Epochs = 10.
2. Type of ANFIS = Sugino type model
3. Number of Inputs = 7 for VA, IOP, and Meds, and 6 for Ops.
4. Number of Outputs = 1 for each model.
5. And operation method: “prod” (Product)
6. Or operation method: “probor” (Probabilistic Or)
7. Implication Method: “prod” (Product)
8. Aggregation Method: “sum”
9. Defuzzification Method: “wtaver” (Weighted Average)
10. Final predicted values are plotted in Figure 3 with the actual outputs to indicate near-perfect models for each of the outputs.

Final predicted values are plotted in Figure 3 with the actual outputs to indicate near-perfect models for each of the outputs.
